# Supplementary material for: Development of Microfluidic Chip-Based Loop-Mediated Isothermal Amplification (LAMP) Method for Detection of Carbapenemase Producing Bacteria
Source: PubMed Central journal article supplement (PMC9603548; doi:10.1128/spectrum.00322-22), 2022-08-18
Supplement: spectrum.00322-22-s0001.pdf [file spectrum.00322-22-s0001.pdf]

## Supplemental Tables

**Table S1.** Primer sequences used for quantitative PCR assays.

| Genes  | Primers sequence (5' → 3') | Reference                |     |
|--------|----------------------------|--------------------------|-----|
| KPC    | Forward primer             | TCGCTAAACTCGAACAGG       | (1) |
|        | Reverse primer             | TTACTGCCCGTTGACGCCCAATCC |     |
| VIM    | Forward primer             | GTTTGGTTCGCATATCGCAAC    | (1) |
|        | Reverse primer             | AATGCGCAGCACCAGGATAG     |     |
| IMP    | Forward primer             | GGAATAGAGTGGCTTAAYTCTC   | (2) |
|        | Reverse primer             | CCAAACYACTASGTTATCT      |     |
| NDM    | Forward primer             | GGTTTGGCGATCTGGTTTTTC    | (2) |
|        | Reverse primer             | CGGAATGGCTCATCACGATC     |     |
| OXA-48 | Forward primer             | GCGTGGTTAAGGATGAACAC     | (2) |
|        | Reverse primer             | CATCAAGTTCAACCCAACCG     |     |
| oprD2  | Forward primer             | ATGAAAGTGATGAAGTGGAGCG   | (3) |
|        | Reverse primer             | TTACAGGATCGACAGCGGATAG   |     |
| OXA-23 | Forward primer             | CCTCAGGTGTGCTGGTTATT     | (4) |
|        | Reverse primer             | ATGTAGAGGCTGGCACATATTC   |     |
| OXA-58 | Forward primer             | ATACTCTCACTGAGGCAGGTTGG  | (5) |
|        | Reverse primer             | CTGTCCCAATGATCACTTGCAA   |     |

**Table S2.** Primer sequences used for LAMP used in this study.

| <b>Genes</b> | <b>Primers sequence (5' → 3')</b> |                                            |
|--------------|-----------------------------------|--------------------------------------------|
| IMP          | IMP-F3                            | GCAGAGTCTTTGCCAGCG                         |
|              | IMP-B3                            | GTCGCTCGGAAACGGAGAGG                       |
|              | IMP-FIP                           | CCGGTTTAGGAACAACGCCCTGAAAAGCTTGCGGAAGGC    |
|              | IMP-BIP                           | TGACACTCCCGTTACGGCTAAAGTTCGAGCCACGCTCCACA  |
|              | IMP-LB                            | ACCCGTAACTTCTTCAAACGAAG                    |
| VIM          | VIM-F3                            | GTGCTTTGACAACGTTTCGC                       |
|              | VIM-B3                            | CGACGTCCCGTCAGCGAA                         |
|              | VIM-FIP                           | AAGCAGAGGTCGTCCGTCCCGTGTGTGCTGGAGCAAGTCT   |
|              | VIM-BIP                           | GCCCGTCAGCCAGCGCGGGGTTGTGCCGTTCCGGAGTT     |
|              | VIM-LF                            | TTCCCCGCAGACGTGCTTG                        |
| NDM          | NDM-F3                            | TTGCACTGGCGGTTTCC                          |
|              | NDM-B3                            | GCCGGCGTCCGAGGTGGTG                        |
|              | NDM-FIP                           | CGGAACCCCTTCGCTTCGGCCAGGTAGCACTCAGTTCGC    |
|              | NDM-BIP                           | CCTGCTGCTCCGCAACTACTCGAGGAAGCCTTGGGTCCA    |
|              | NDM-LF                            | TCAACCGTGACGGCAAGA                         |
| oprD         | oprD-F3                           | TTGCACTGGCGTATTCC                          |
|              | oprD-B3                           | GCCGGATTCATAGGTAGTG                        |
|              | oprD-FIP                          | ATGAACCCCTTCGCTTGGGCCAGGTAGCACTCAGTTCGC    |
|              | oprD-BIP                          | CCTGCTGCTCCGCAACTACTATAGGAAGCCTTGGGTCCA    |
|              | oprD-LB                           | TCAACCGTTACGGCAAGA                         |
|              | oprD-LF                           | TGATCGCTGACGAATGCGT                        |
| KPC          | KPC-F3                            | GGCAGCAGTTTGTGCGTGG                        |
|              | KPC-B3                            | CGCTGTGCTTGTCCGCCT                         |
|              | KPC-FIP                           | GGTTTTGTCTCCGACTGCCACTAAAGGGAAACACGACCGG   |
|              | KPC-BIP                           | TGGCACGGCAACGGACTCGGCCGACGGCCAACACACGAGGTG |
| OXA-23       | OXA23-F3                          | CAGACGCGGTGCCAGCCTCT                       |
|              | OXA23-B3                          | CGCGACGTCGCGCAAGTT                         |
|              | OXA23-FIP                         | TGACCTTTTCTCGCCCTTCCCGGTTGACGGCCCTGCGCGGA  |

|                     |           |                                                 |
|---------------------|-----------|-------------------------------------------------|
|                     | OXA23-BIP | CCGCTTGGGAAAAAGACCGGACACCCTGCGAGACTGGGACTGC     |
|                     | OXA23-LB  | AGGAGAAGCCCGGAAGCTTTC                           |
| OXA-48              | OXA48-F3  | GCGTCGCGGACGGCCTGCG                             |
|                     | OXA48-B3  | TGTTCCGCCTTAACCACGC                             |
|                     | OXA48-FIP | GCACAACACTACGCCCTGTGCGTTTCGGTAGCAAAGGACGGGCAAGA |
|                     | OXA48-BIP | TAAACGGGCGAACCAAGCCGGGCGCGCAAGCTCGTGGGA         |
|                     | OXA48-LF  | GTTCAGTAAAGTGAGCCGTCCAAC                        |
| OXA-58              | OXA58-BIP | AGAGCGCAGAGGGGAGAATC-CACTTGCGGGTCTACAGC         |
|                     | OXA58-LF  | GAAAGGGCCTTTGACAATTACACC                        |
|                     | OXA58-LB  | ATGCTAAAAGTGGCTGGGGAAT                          |
|                     | OXA58-BIP | AGAGCGCAGAGGGGAGAATC-CACTTGCGGGTCTACAGC         |
| Positive<br>Control | PC-F3     | ATCTCACACTCATGGCAG                              |
|                     | PC-B3     | CCAAAACACTGCAGCTTGG                             |
|                     | PC-FIP    | AAGCTCAAGAACAACCCGTCCCCCTTCCACATTCCACTT         |
|                     | PC-BIP    | GTGCTAGGAAGCCGTTTTTTTTATGCCCCCTGTAGAGAACATTCTT  |
|                     | PC-LF     | GTAATAATGACTTAATGGAA                            |
|                     | PC-LB     | TGGCATCCTTTTCATATGTTC                           |

---

**Table S3.** Carbapenemase misclassified strains by the microfluidic chip-based LAMP amplification

method in retrospective study.

| Organism (n)            | Reference method (culture plus sequencing) | Microfluidic chips       |
|-------------------------|--------------------------------------------|--------------------------|
| <i>K.pneumoniae</i> (1) | NA                                         | KPC                      |
| <i>K.pneumoniae</i> (1) | NA                                         | oprD2                    |
| <i>K.pneumoniae</i> (1) | KPC                                        | Negative                 |
| <i>K.pneumoniae</i> (1) | KPC                                        | KPC+OXA-23               |
| <i>K.pneumoniae</i> (2) | KPC                                        | NDM                      |
| <i>K.pneumoniae</i> (1) | IMP+KPC                                    | NDM+KPC                  |
| <i>K.pneumoniae</i> (1) | IMP                                        | KPC                      |
| <i>E. coli</i> (2)      | KPC                                        | KPC+NDM                  |
| <i>E. coli</i> (1)      | NDM                                        | KPC+NDM                  |
| <i>E. coli</i> (2)      | NDM                                        | KPC                      |
| <i>E. coli</i> (1)      | NDM                                        | IMP                      |
| <i>K.pneumoniae</i> (1) | NDM                                        | oprD2+NDM                |
| <i>K.pneumoniae</i> (2) | NDM                                        | KPC+NDM                  |
| <i>A. baumannii</i> (1) | OXA-23                                     | OXA-23+NDM               |
| <i>A. baumannii</i> (1) | OXA-23                                     | Negative                 |
| <i>A. baumannii</i> (2) | OXA-23+KPC                                 | OXA-23+KPC+NDM           |
| <i>A. baumannii</i> (2) | OXA-23+NDM                                 | OXA-23+KPC+NDM           |
| <i>A. baumannii</i> (1) | OXA-23+KPC+OXA-48                          | OXA-23+KPC+OXA-48+OXA-58 |

**Table S4.** Summary of the results of the microfluidic chip-based LAMP amplification method compared to the truth consisting of conventional molecular (Sequencing) carbapenemase detection tests in retrospective study.

|                           | Organism            | TP (%)    | TN (%)    | FP (%)    | FN (%)  | Total |
|---------------------------|---------------------|-----------|-----------|-----------|---------|-------|
| <b>Enterobacteriaceae</b> | <i>K.pneumoniae</i> | 37 (55.2) | 19 (28.4) | 10 (14.9) | 1 (1.5) | 67    |
|                           | <i>E. coli</i>      | 16 (32.0) | 28 (56)   | 6 (12.0)  | 0 (0.0) | 50    |
|                           | <i>E. cloacae</i>   | 2 (100.0) | 0 (0.0)   | 0 (0.0)   | 0 (0.0) | 2     |
|                           | <i>C. Koseri</i>    | 2 (33.3)  | 4 (66.7)  | 0 (0.0)   | 0 (0.0) | 6     |
| <b>Non-fermentative</b>   | <i>A. baumannii</i> | 29 (43.3) | 31 (46.3) | 6 (8.9)   | 1 (1.5) | 67    |
|                           | Total               | 86 (44.8) | 82 (42.7) | 22 (11.5) | 2 (1.0) | 192   |

TP: True positive; FP: False positive; TN: True negative; FN: False negative

**Table S5.** Detection performance of microfluidic chip-based LAMP amplification method for single carbapenemase, multiples carbapenemase and carbapenemase negative bacteria.

| Bacteria                  | Total | Accuracy [95% CI] |
|---------------------------|-------|-------------------|
| Single carbapenemase      | 79    | 80.0 [69.5-87.2]  |
| <i>Enterobacteriaceae</i> | 58    |                   |
| Non-fermentative          | 21    |                   |
| Multiples carbapenemase   | 29    | 79.3 [61.3-90.5]  |
| <i>Enterobacteriaceae</i> | 14    |                   |
| Non-fermentative          | 15    |                   |
| Carbapenemase negative    | 84    | 98.8 [92.8-100.0] |
| <i>Enterobacteriaceae</i> | 53    |                   |
| Non-fermentative          | 31    |                   |

**Table S6.** Results from the microfluidic chip-based LAMP amplification method (directly isolate from BCs) and the reference method (culture plus sequencing) <sup>a</sup>.

| Organism (n)            | Microfluidic chips | Reference method (culture plus sequencing) | Outcome |
|-------------------------|--------------------|--------------------------------------------|---------|
| <i>K.pneumoniae</i> (1) | KPC                | NA                                         | FP      |
| <i>E. coli</i> (1)      | KPC                | NA                                         | FP      |
| <i>E. coli</i> (1)      | oprD2              | NA                                         | FP      |
| <i>A. baumannii</i> (1) | OXA-23             | NA                                         | FP      |
| <i>E. coli</i> (5)      | KPC                | KPC                                        | TP      |
| <i>E. coli</i> (1)      | KPC+NDM            | KPC+NDM                                    | TP      |
| <i>E. coli</i> (1)      | KPC+oprD2          | KPC                                        | FP      |
| <i>K.pneumoniae</i> (5) | KPC                | KPC                                        | TP      |
| <i>K.pneumoniae</i> (1) | KPC+NDM            | KPC                                        | FP      |
| <i>P. mirabilis</i> (1) | KPC                | KPC                                        | TP      |
| <i>A. baumannii</i> (1) | OXA-23+OXA-48+KPC  | OXA-23+KPC                                 | FP      |
| <i>A. baumannii</i> (2) | OXA-23+NDM         | OXA-23+NDM                                 | TP      |
| <i>A. baumannii</i> (1) | OXA-23+OXA-48+NDM  | OXA-23+NDM                                 | FP      |

<sup>a</sup> True-positive and false-positive results are shown

TP: True positive; FP: False positive; NA, Not applicable

## Supplemental References

1. Monteiro J, Widen RH, Pignatari AC, Kubasek C, Silbert S. 2012. Rapid detection of carbapenemase genes by multiplex real-time PCR. *J Antimicrob Chemother* 67: 906-909. <https://doi.org/10.1093/jac/dkr563>.
2. Liu Q, Liu L, Li Y, Chen X, Yan Q, Liu WE. 2019. Fecal Carriage and Epidemiology of Carbapenem-Resistant Enterobacteriaceae Among Hospitalized Patients in a University Hospital. *Infect Drug Resist* 12:3935-3942. <https://doi.org/10.2147/IDR.S233795>.
3. Shen J, Pan Y, Fang Y. 2015. Role of the Outer Membrane Protein OprD2 in Carbapenem-Resistance Mechanisms of *Pseudomonas aeruginosa*. *PLoS One* 10:e0139995. <https://doi.org/10.1371/journal.pone.0139995>.
4. Teo JW, La MV, Lin RT. 2016. Development and evaluation of a multiplex real-time PCR for the detection of IMP, VIM, and OXA-23 carbapenemase gene families on the BD MAX open system. *Diagn Microbiol Infect Dis* 86:358-361. <https://doi.org/10.1016/j.diagmicrobio.2016.08.019>.
5. Girlich D, Bonnin RA, Bogaerts P, De Laveleye M, Huang DT, Dortet L, Glaser P, Glupczynski Y, Naas T. 2017. Chromosomal Amplification of the blaOXA-58 Carbapenemase Gene in a *Proteus mirabilis* Clinical Isolate. *Antimicrob Agents Chemother* 61:e01697-16. <https://doi.org/10.1128/AAC.01697-16>.
